# Supplementary material for: Synthesis, Adsorption, and Recognition Properties of a Solid Symmetric Tetramethylcucurbit[6]uril-Based Porous Supramolecular Framework
Source: Hindawi journal article supplement (doi:10.1155/2020/9619461), 2020-03-21
Supplement: f1 [file 9619461.f1.pdf]

## Supporting Information

### Preparation, adsorption and recognition properties of a facile solid symmetric tetramethylcucurbit[6]uril-based porous supramolecular assembly

Fei Yang Tian, Rui Xue Cheng, Yun Qian Zhang, Zhu Tao,\* Qian Jiang Zhu

<sup>†</sup> Key Laboratory of Macrocyclic and Supramolecular Chemistry of Guizhou Province, Guizhou University, Guiyang 550025, People's Republic of China.

\*Corresponding Email Address: gzutao@263.net

#### EXPERIMENTAL SECTION

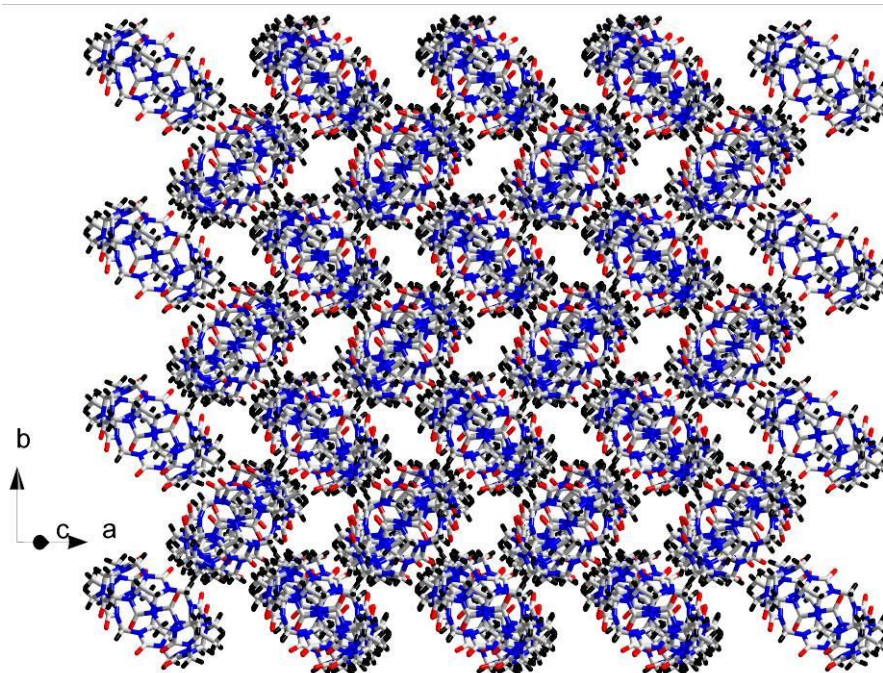

**Fig. S1** Stacking structure from *ab* plane in compound A.

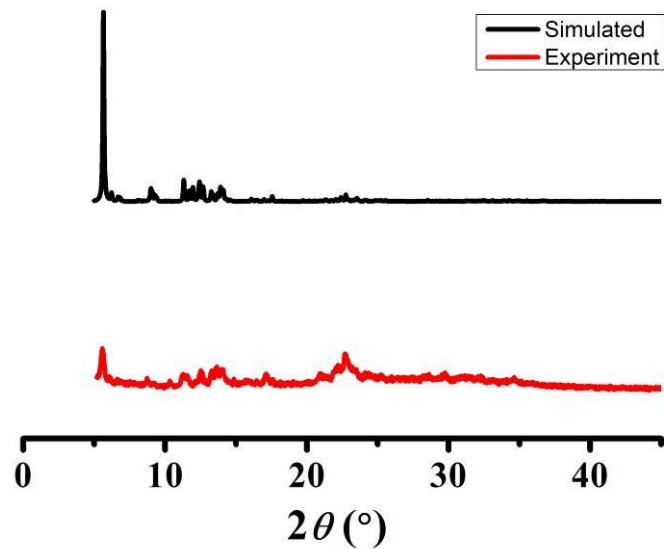

**Fig. S2** Powder X-ray diffraction analyses of **A** (top) and comparison with simulation (bottom)

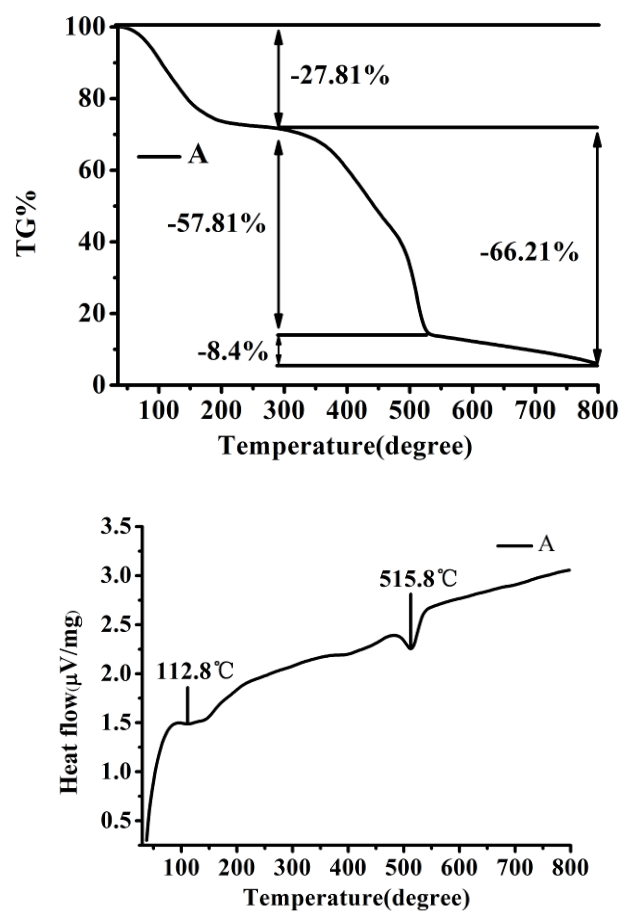

**Fig. S3** TG (top) and DTA (bottom) curves of **A** in  $N_2$ .

**Table S1** (in the first column) Selected 15 fluorophore guests (**FGs**); (in the second column) General survey of loading **A** with 15 fluorophore guests (**FGs**) to form luminescent assemblies (**FG@As**) by comparison of colour and fluorescence spectra of **FG** and solid **FG@As**, respectively.

| fluorophore guests                                                                                                                                                                            | Survey of loading <b>A</b> with <b>FG</b><br>(saturated adsorption)                                                                                                                                                                                                                                                                                                                                                                                                                                                                                                                                                                                                                                                                                              |
|-----------------------------------------------------------------------------------------------------------------------------------------------------------------------------------------------|------------------------------------------------------------------------------------------------------------------------------------------------------------------------------------------------------------------------------------------------------------------------------------------------------------------------------------------------------------------------------------------------------------------------------------------------------------------------------------------------------------------------------------------------------------------------------------------------------------------------------------------------------------------------------------------------------------------------------------------------------------------|
| <p style="text-align: center;"><b>FG1</b></p> 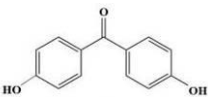 <p style="text-align: center;">4,4'-dihydroxybenzophenone</p> | <div style="display: flex; justify-content: space-around;"> <div style="text-align: center;"> <p><b>FG1</b></p>  </div> <div style="text-align: center;"> <p><b>FG1@A</b></p>  </div> </div>  <p>The graph shows Intensity (a.u.) on the y-axis (0 to 500) and Wavelength (nm) on the x-axis (350 to 450). The black curve (FG1) has a peak at approximately 385 nm with an intensity of about 200. The red curve (FG1@A) has a peak at approximately 385 nm with a higher intensity of about 450.</p>       |
| <p style="text-align: center;"><b>FG2</b></p>  <p style="text-align: center;">levofloxacin</p>             | <div style="display: flex; justify-content: space-around;"> <div style="text-align: center;"> <p><b>FG2</b></p>  </div> <div style="text-align: center;"> <p><b>FG2@A</b></p>  </div> </div>  <p>The graph shows Intensity (a.u.) on the y-axis (0 to 500) and Wavelength (nm) on the x-axis (400 to 700). The black curve (FG2) has a peak at approximately 485 nm with an intensity of about 250. The red curve (FG2@A) has a peak at approximately 485 nm with a higher intensity of about 450.</p> |

### FG3

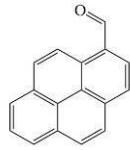

1-pyrenecarboxaldehyde

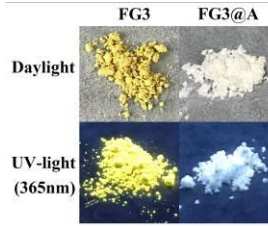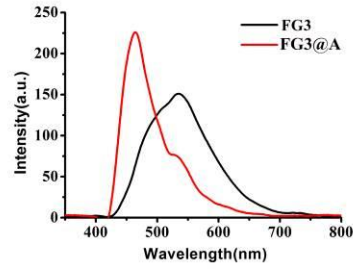

### FG4

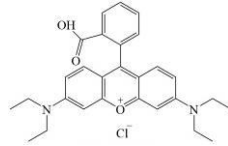

rhodamine B

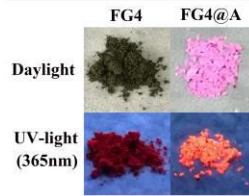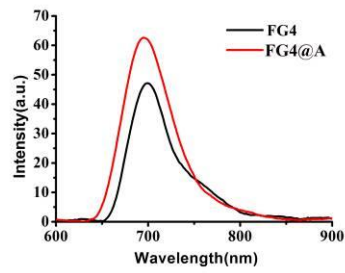

### FG5

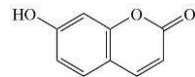

7-hydroxycoumarin

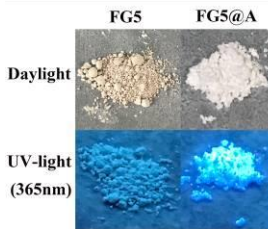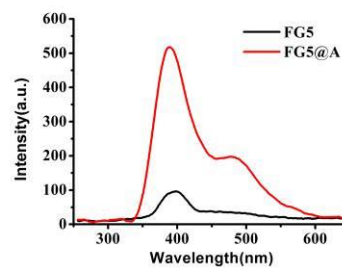

### FG6

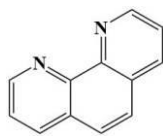

1,10-phenanthroline

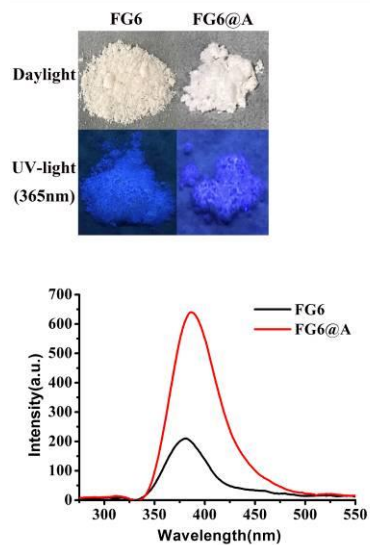

### FG7

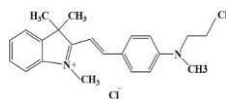

astrazon pink FG

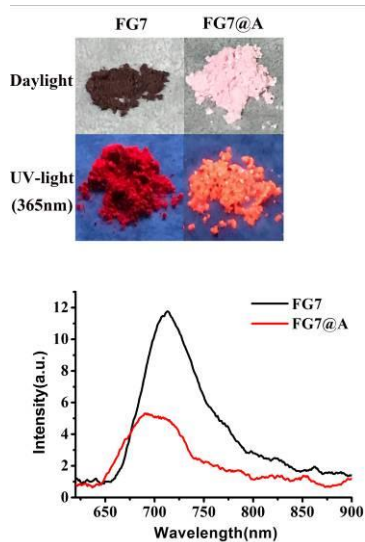

### FG8

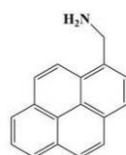

1-pyrenemethylamine hydrochloride

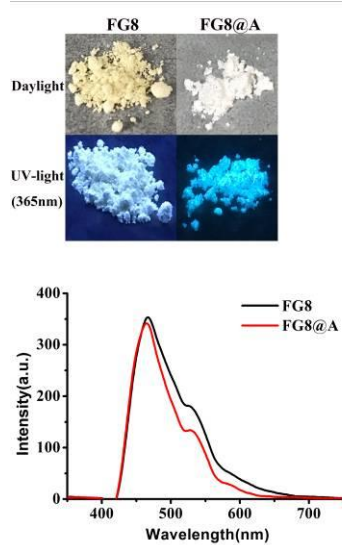

### FG9

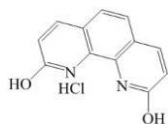

Neocuproine hydrochloride

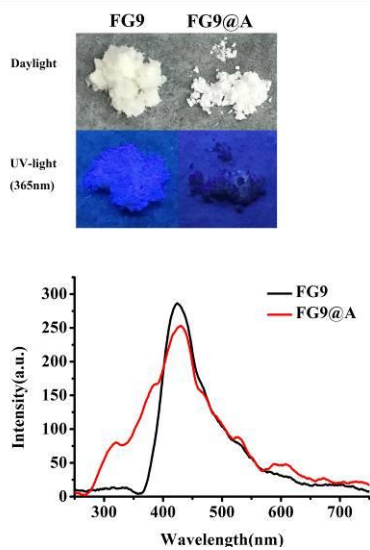

### FG10

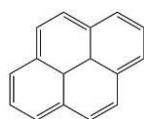

pyrene

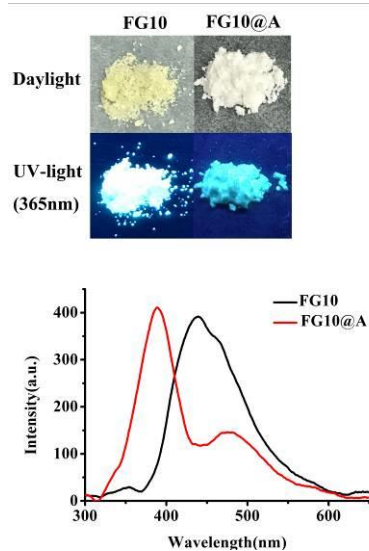

### FG11

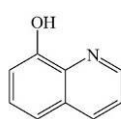

8-hydroxyquinoline

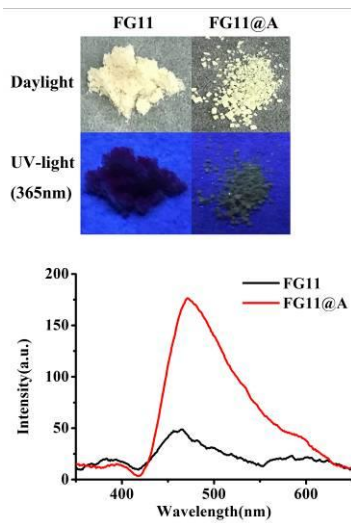

### FG12

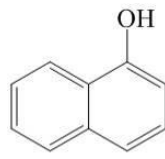

1-Naphthol

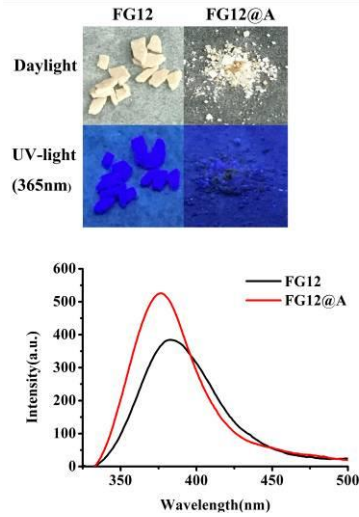

### FG13

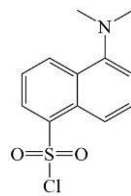

Dansyl chloride

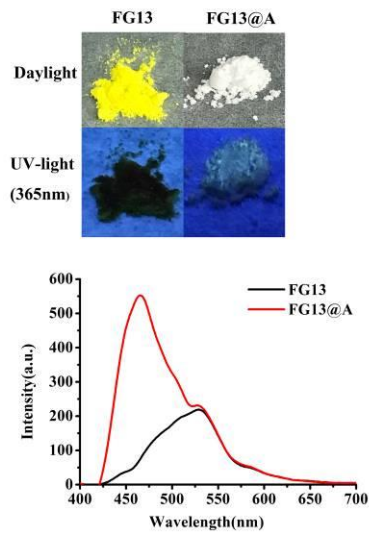

### FG14

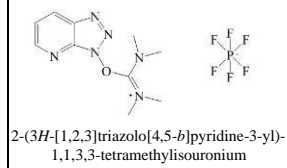

2-(3*H*-[1,2,3]triazolo[4,5-*b*]pyridine-3-yl)-1,1,3,3-tetramethylisouronium

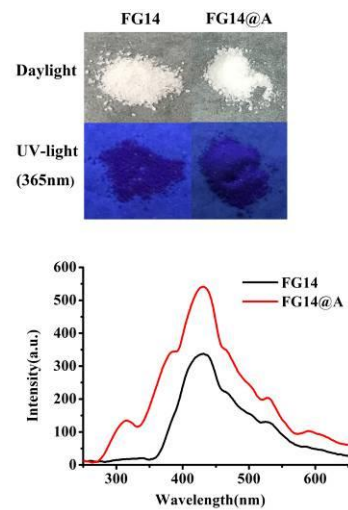



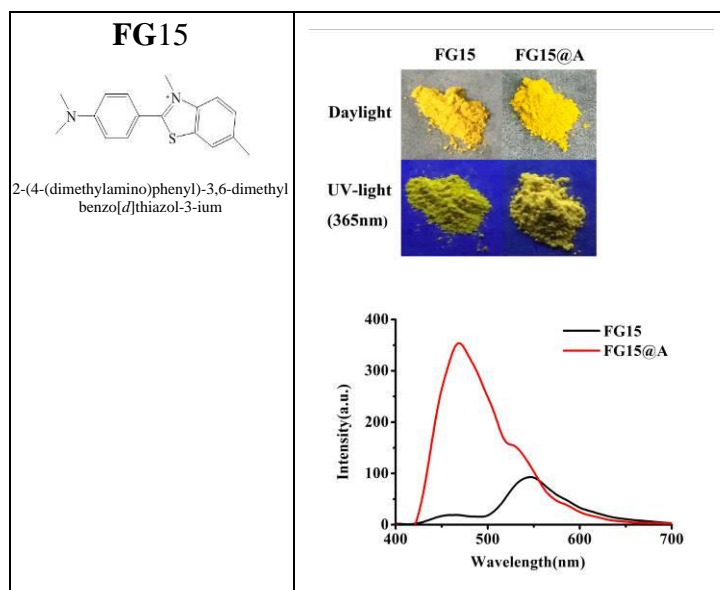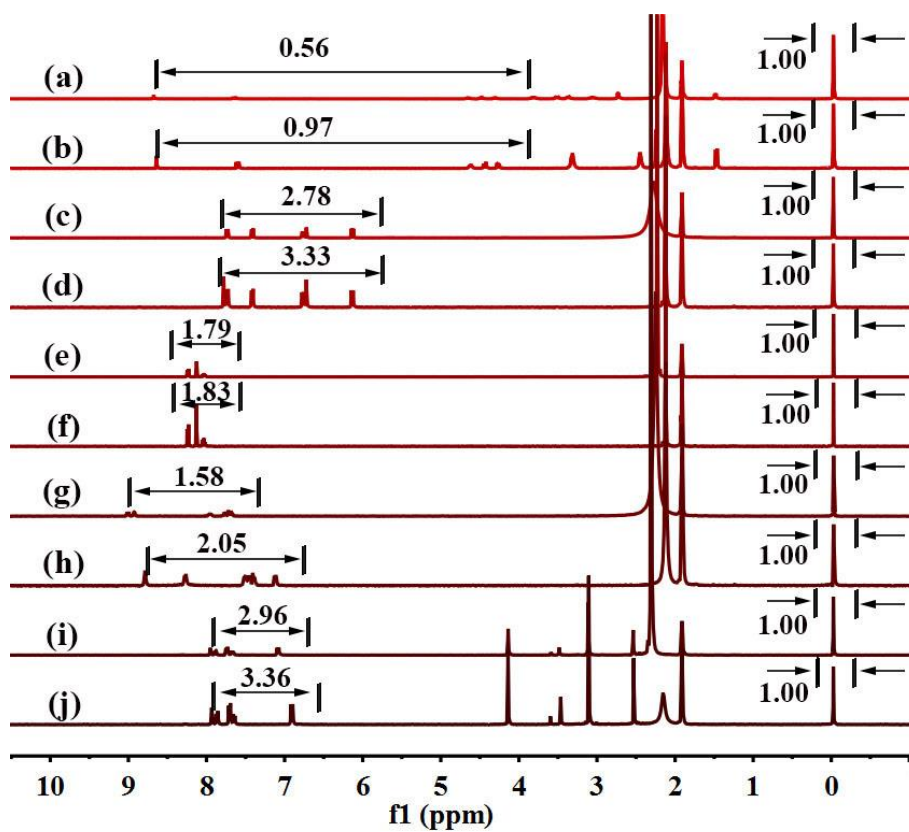

**Fig. S4**  $^1\text{H}$  NMR spectra in deuterated acetonitrile: (a) 0.5 mL 0.01 M **FG2** added 10 mg **A**; (b) 0.5 mL 0.01 M **FG2**; (c) 0.5 mL 0.01 M **FG5** added 10 mg **A**; (d) 0.5 mL 0.01 M **FG5**; (e) 0.5 mL 0.01 M **FG10** added 10 mg **A**; (f) 0.5 mL 0.01 M **FG10**; (g) 0.5 mL 0.01 M **FG11** added 10 mg **A**; (h) 0.5 mL 0.01 M **FG11**; (i) 0.5 mL 0.01 M **FG15** added 10 mg **A**; (j) 0.5 mL 0.01 M **FG15**;



**Table S2.** Normalized adsorption data of **A** for five dyes, respectively (mol/g)

| <b>A</b> | (b) <b>FG</b>             | (d) <b>FG5</b>            |                           |  |
|----------|---------------------------|---------------------------|---------------------------|--|
|          | (a) $2.11 \times 10^{-6}$ | (c) $2.75 \times 10^{-7}$ |                           |  |
|          | (f) <b>FG10</b>           | (h) <b>FG11</b>           | (j) <b>FG15</b>           |  |
|          | (e) $1.11 \times 10^{-7}$ | (g) $1.15 \times 10^{-6}$ | (i) $5.98 \times 10^{-6}$ |  |

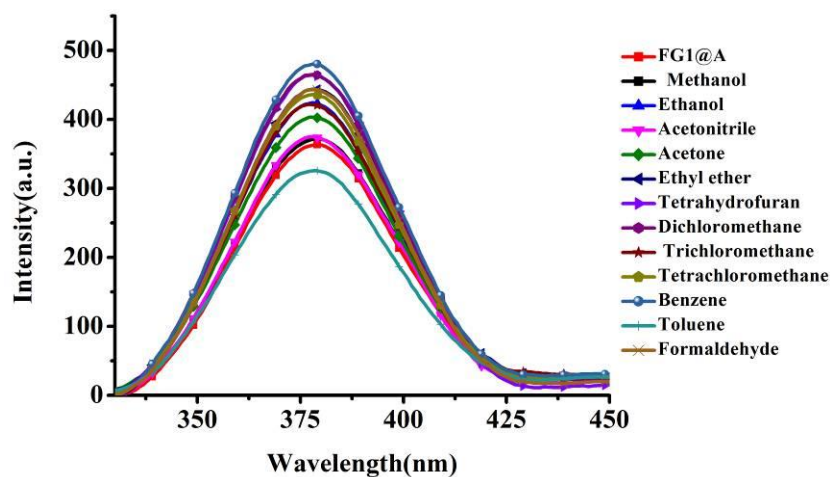

**Fig. S5** General survey of fluorescence spectra of **FG1@A** loaded with the 12 **VOCs**, respectively.

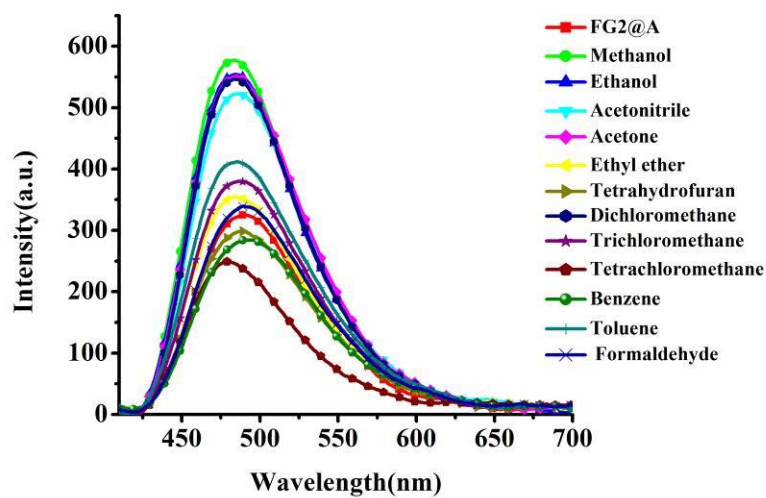

**Fig. S6** General survey of fluorescence spectra of **FG2@A** loaded with the 12 **VOCs**, respectively.

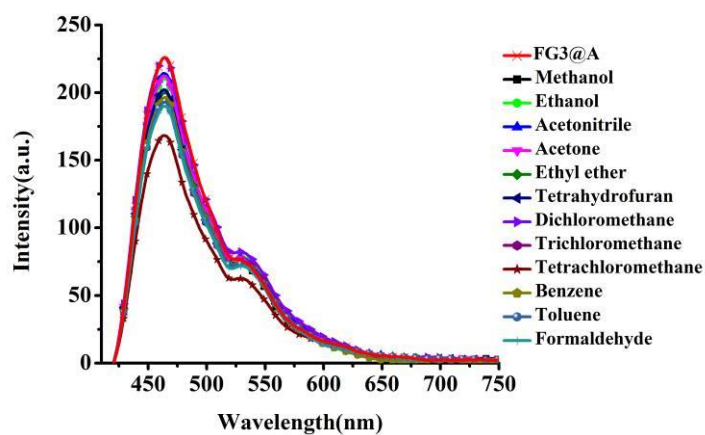

**Fig. S7** General survey of fluorescence spectra of **FG3@A** loaded with the 12 VOCs, respectively.

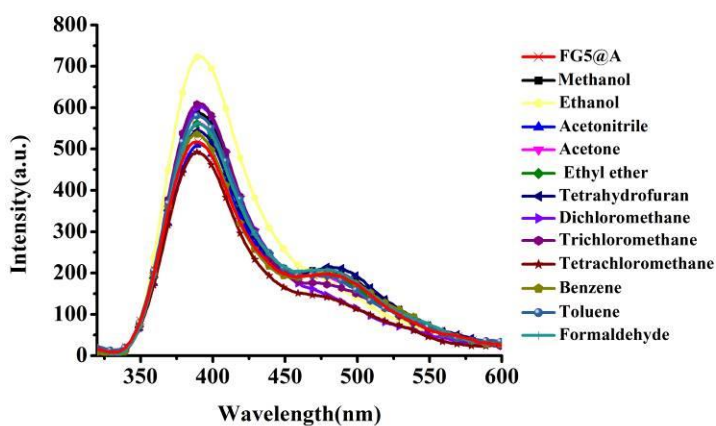

**Fig. S8** General survey of fluorescence spectra of **FG5@A** loaded with the 12 VOCs, respectively.

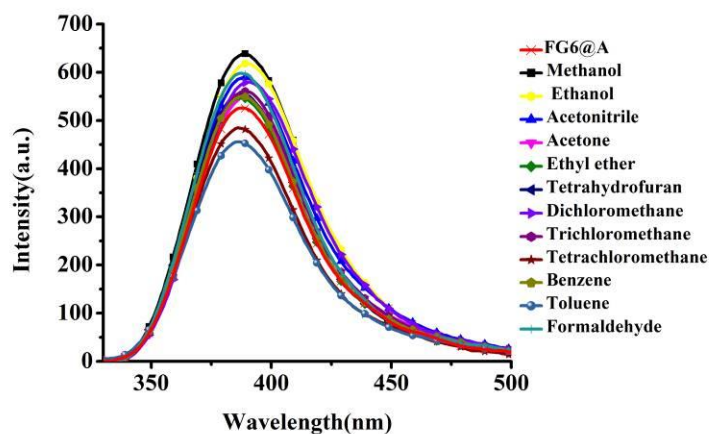

**Fig. S9** General survey of fluorescence spectra of **FG6@A** loaded with the 12 VOCs, respectively.

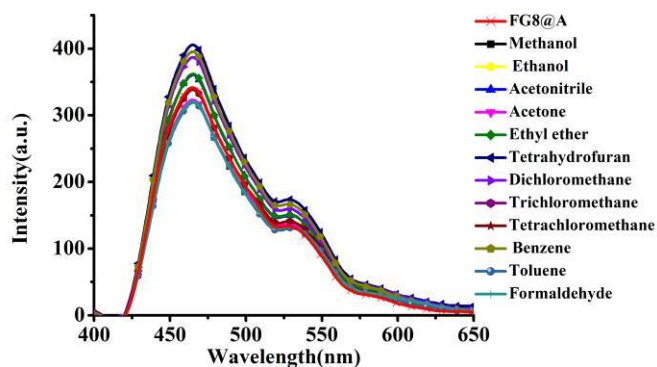

**Fig. S10** General survey of fluorescence spectra of **FG8@A** loaded with the 12 VOCs, respectively.

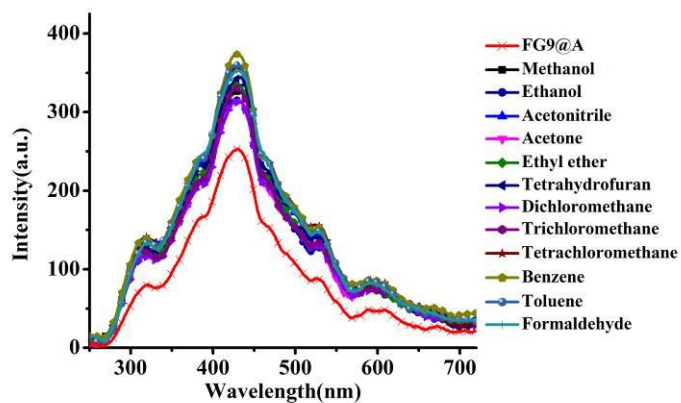

**Fig. S11** General survey of fluorescence spectra of **FG9@A** loaded with the 12 VOCs, respectively.

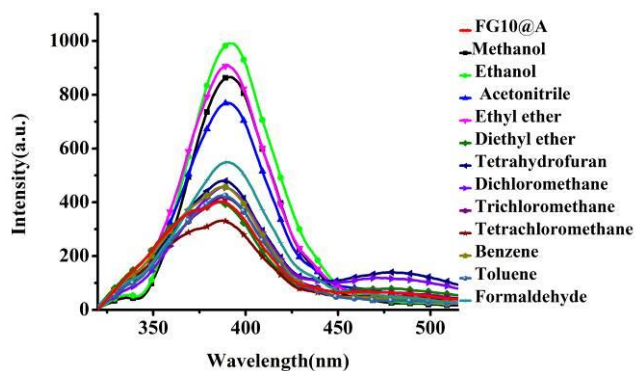

**Fig. S12** General survey of fluorescence spectra of **FG10@A** loaded with the 12 VOCs, respectively.

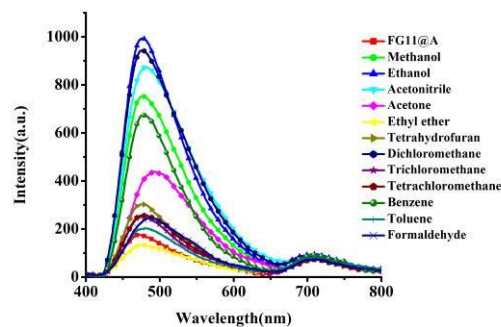

**Fig. S13** General survey of fluorescence spectra of **FG11@A** loaded with the 12 VOCs, respectively.

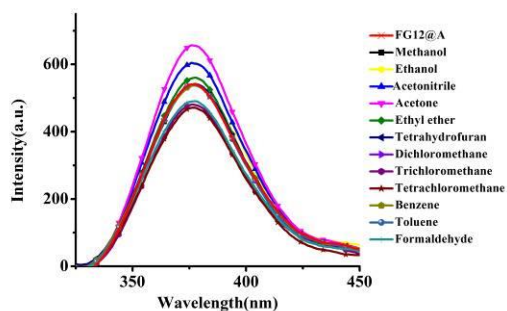

**Fig. S14** General survey of fluorescence spectra of **FG12@A** loaded with the 12 VOCs, respectively.

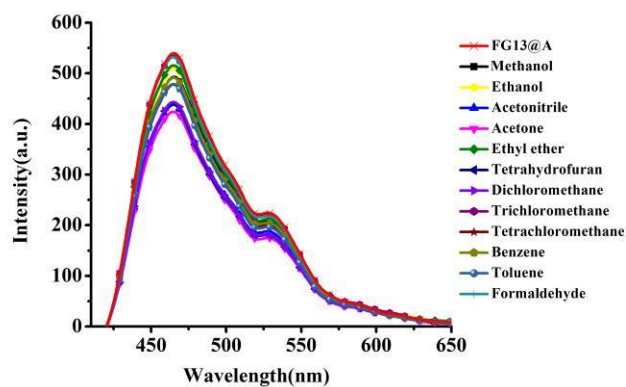

**Fig. S15** General survey of fluorescence spectra of FG13@A loaded with the 12 VOCs, respectively.

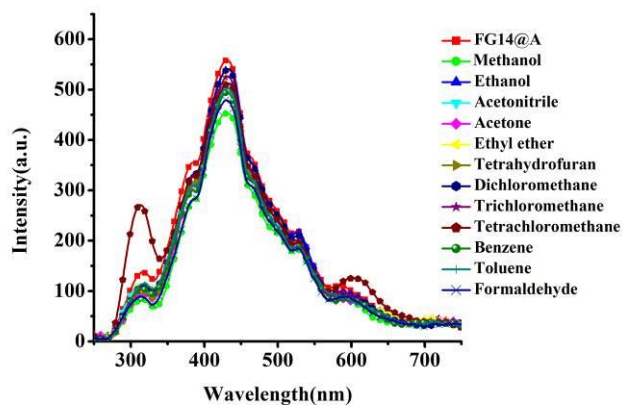

**Fig. S16** General survey of fluorescence spectra of FG14@A loaded with the 12 VOCs, respectively.

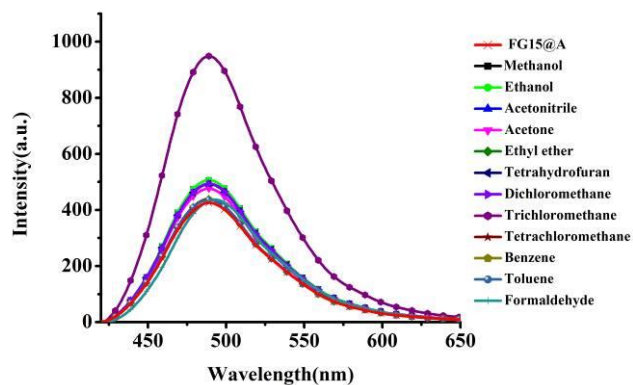

**Fig. S17** General survey of fluorescence spectra of FG15@A loaded with the 12 VOCs, respectively.

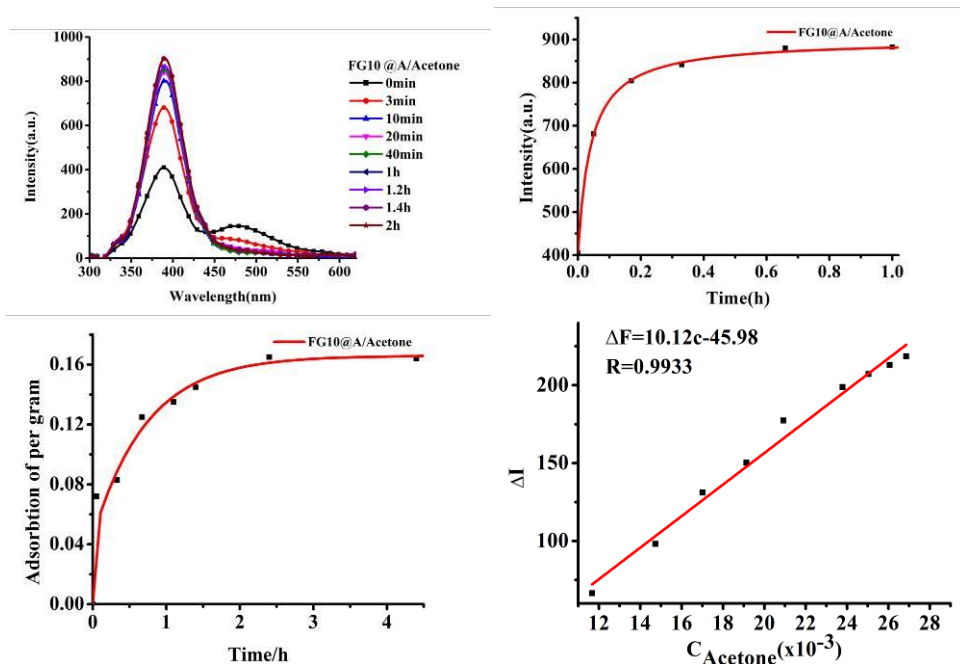

**Fig. S18** (a) Titration fluorescence spectra of the loading of **FG10@A** with acetone; (b) Change in fluorescence intensity of **FG10@A** with increasing adsorption time; (c) Adsorption profile of the loading of acetone in **FG10@A**; (d) Plot of  $\Delta I$  vs. the amount of acetone adsorbed by solid **FG10@A**.

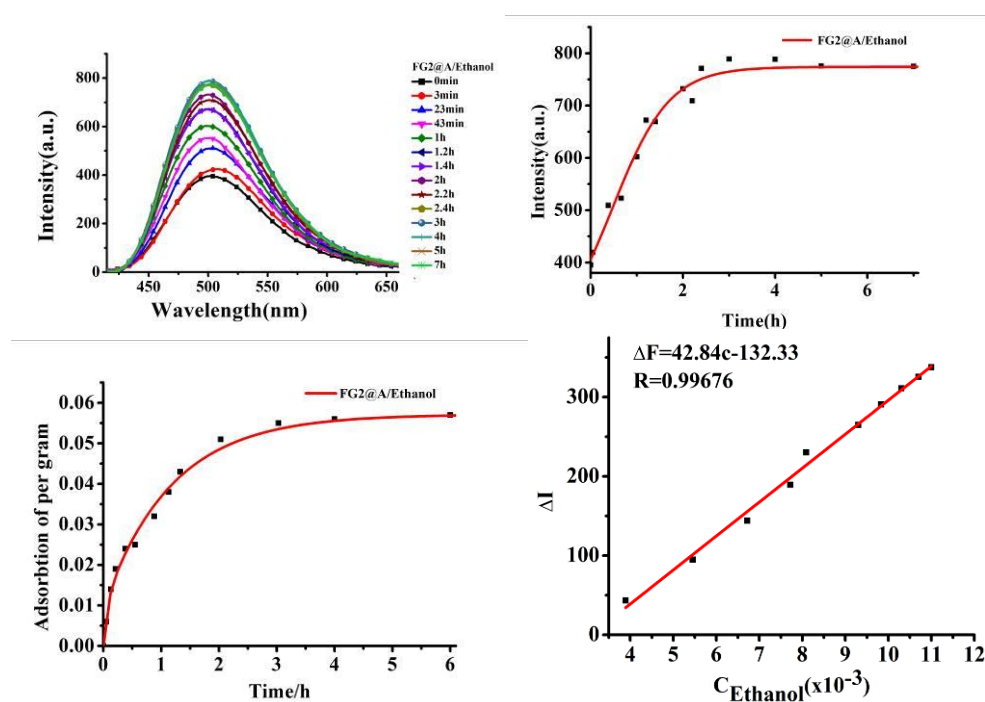

**Fig. S19** (a) Titration fluorescence spectra of the loading of **FG2@A** with ethanol; (b) Change in fluorescence intensity of **FG2@A** with increasing adsorption time; (c) Adsorption profile of the loading of ethanol in **FG2@A**; (d) Plot of  $\Delta I$  vs. the amount of ethanol adsorbed by solid **FG2@A**.

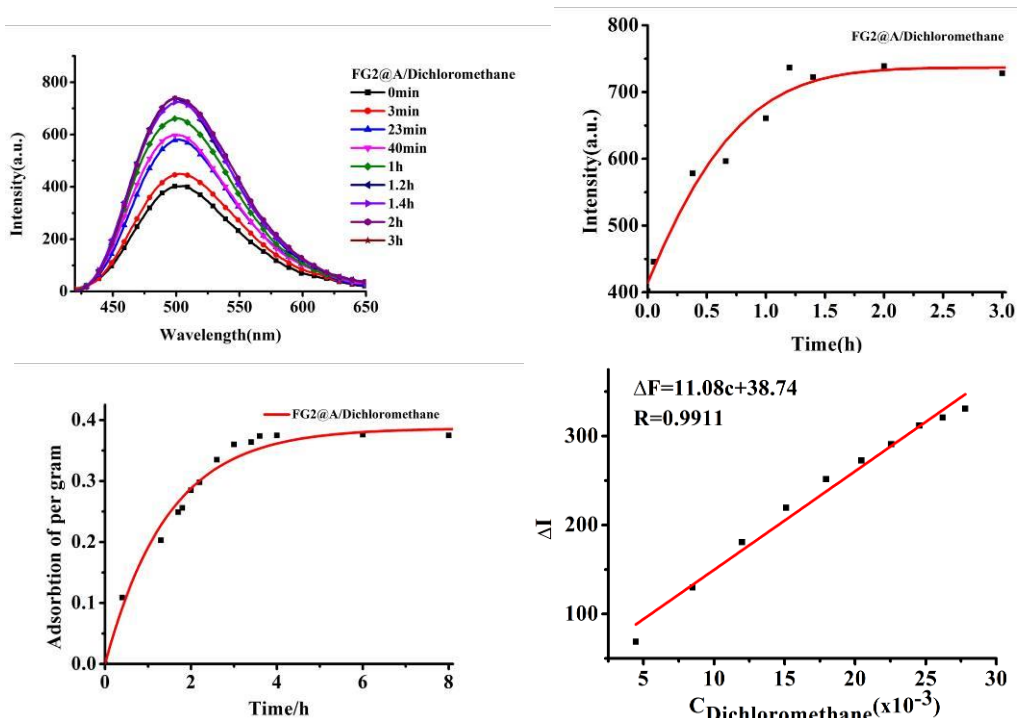

**Fig. S20** (a) Titration fluorescence spectra of the loading of **FG2@A** with dichloromethane; (b) Change in fluorescence intensity of **FG2@A** with increasing adsorption time; (c) Adsorption profile of the loading of dichloromethane in **FG2@A**; (d) Plot of  $\Delta I$  vs. the amount of dichloromethane adsorbed by solid **FG2@A**.

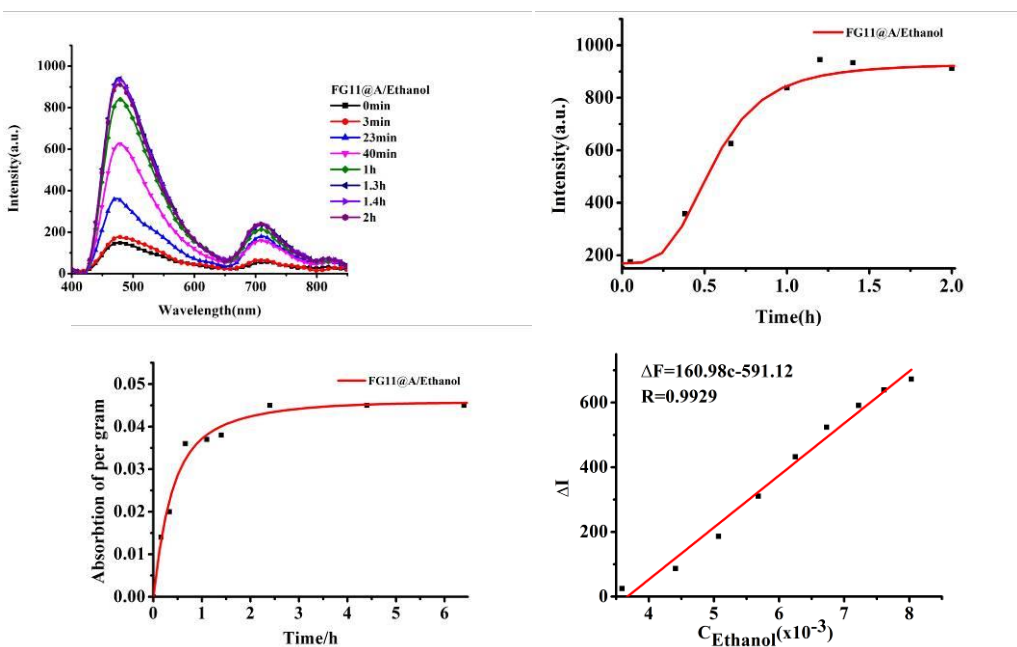

**Fig. S21** (a) Titration fluorescence spectra of the loading of **FG11@A** with ethanol; (b) Change in fluorescence intensity of **FG11@A** with increasing adsorption time; (c) Adsorption profile of the loading of ethanol in **FG11@A**; (d) Plot of  $\Delta I$  vs. the amount of ethanol adsorbed by solid **FG11@A**.



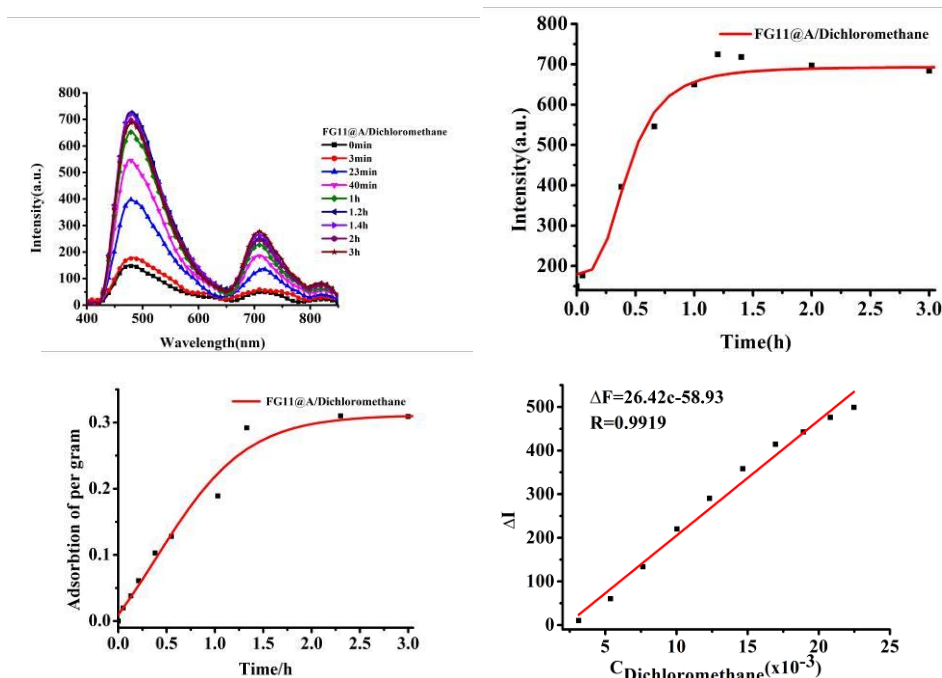

**Fig. S22** (a) Titration fluorescence spectra of the loading of **FG11@A** with dichloromethane; (b) Change in fluorescence intensity of **FG11@A** with increasing adsorption time; (c) Adsorption profile of the loading of dichloromethane in **FG11@A**; (d) Plot of  $\Delta I$  vs. the amount of dichloromethane adsorbed by solid **FG11@A**.

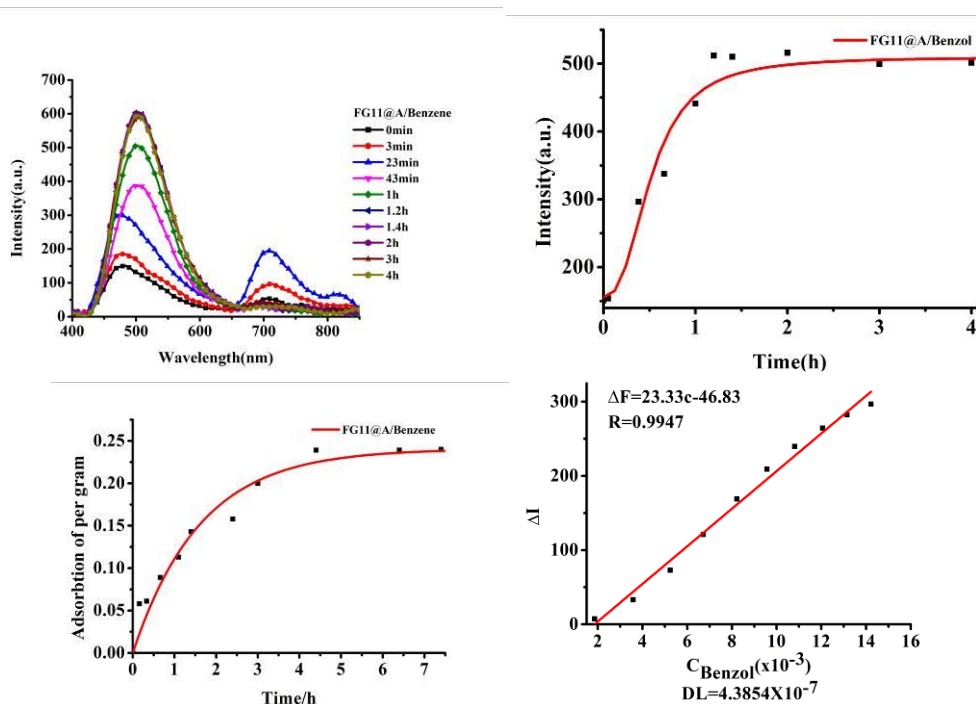

**Fig. S23** (a) Titration fluorescence spectra of the loading of **FG11@A** with benzol; (b) Change in fluorescence intensity of **FG11@A** with increasing adsorption time; (c) Adsorption profile of the loading of benzol in **FG11@A**; (d) Plot of  $\Delta I$  vs. the amount of benzol adsorbed by solid **FG11@A**.

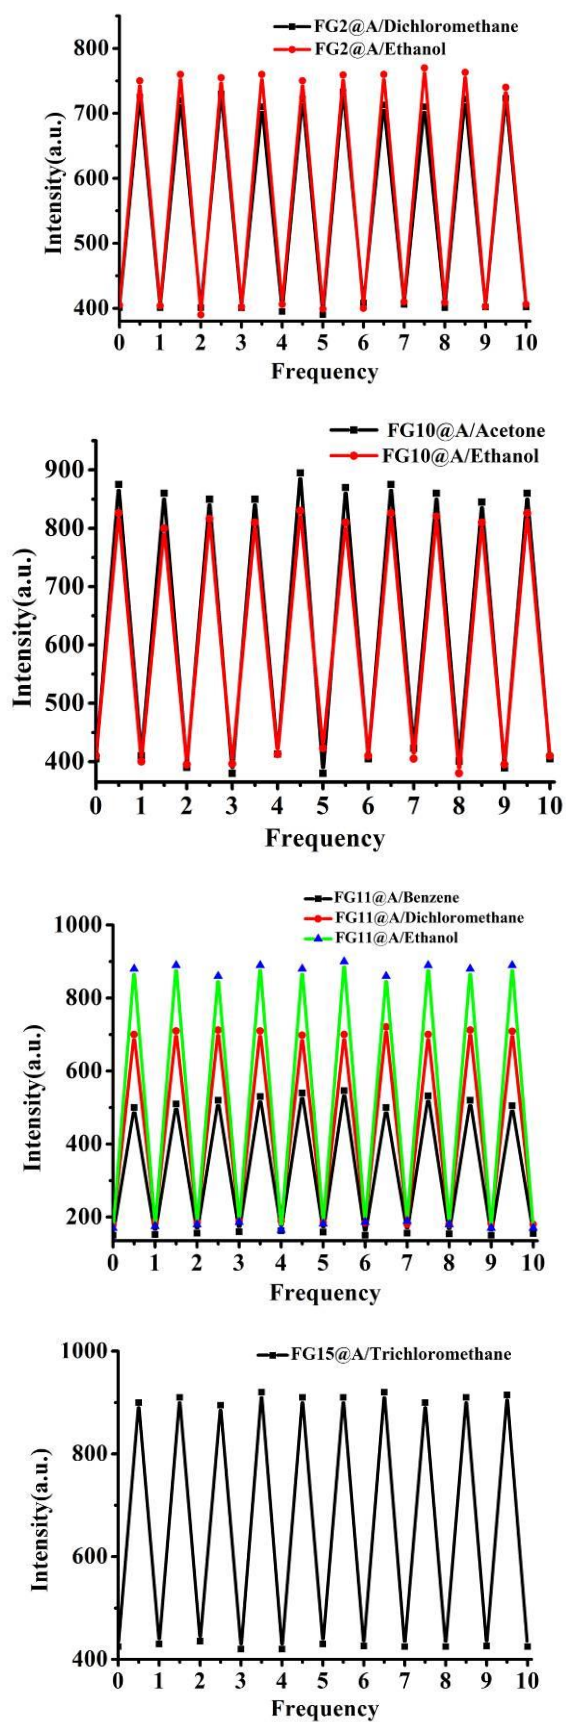

**Fig. S24** Lifetime experiments of fluorescence strength of solid **FG@As** for selected volatile compounds.

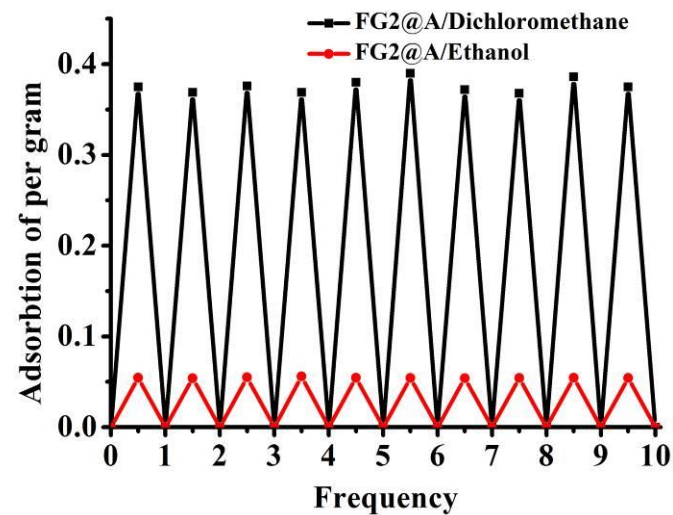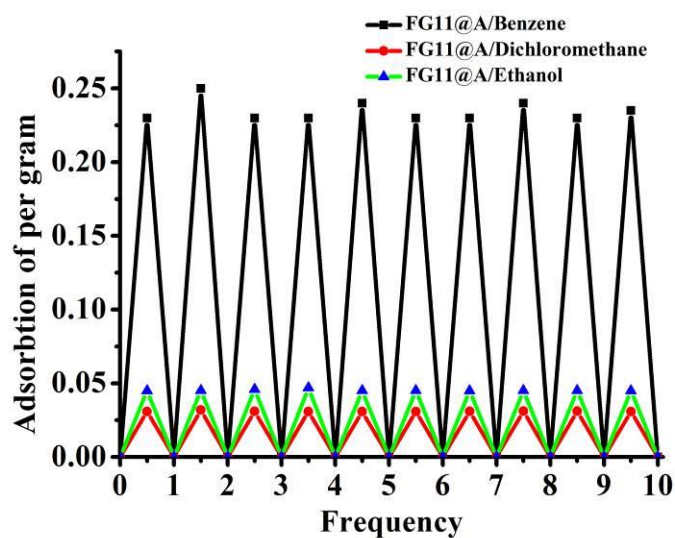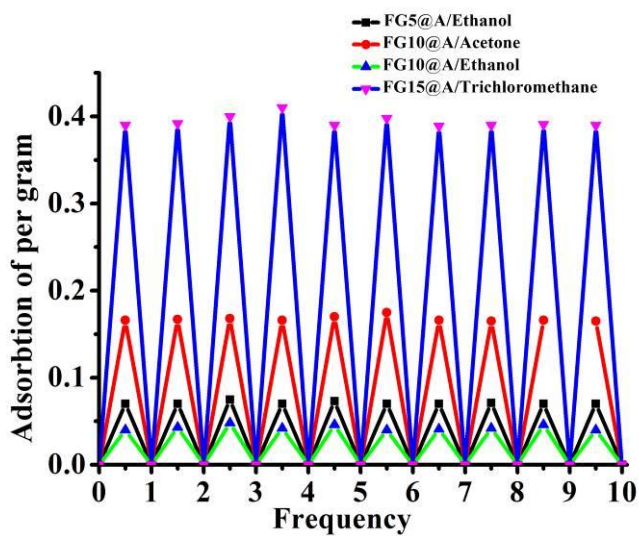

**Fig. S25** Lifetime experiments of adsorption capacities of selected solid **FG@As** for selected VOCs.

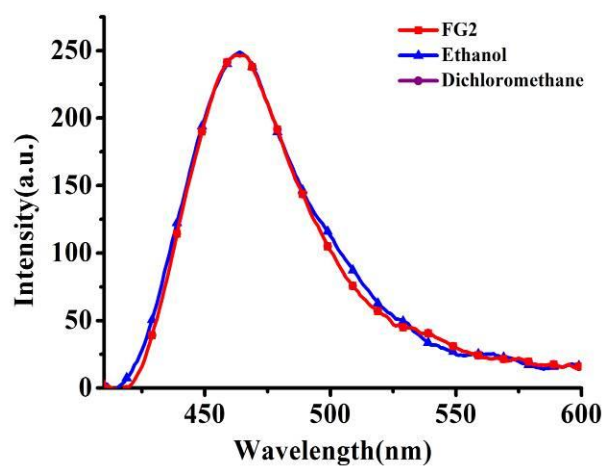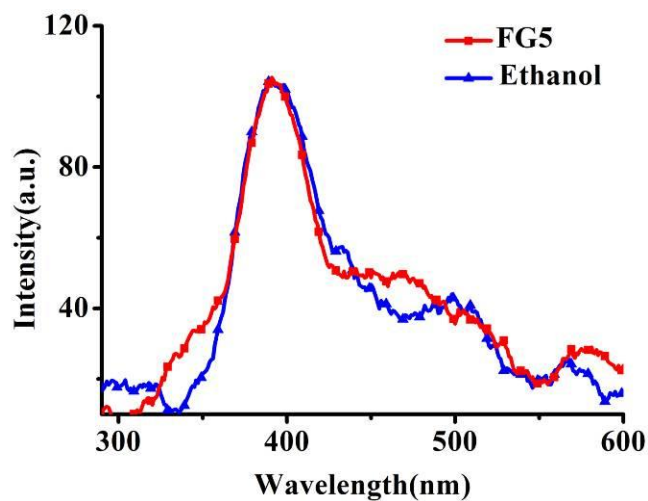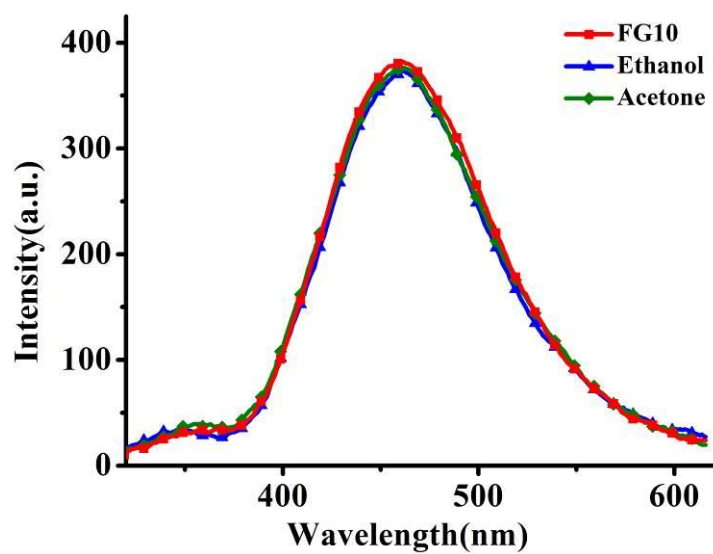

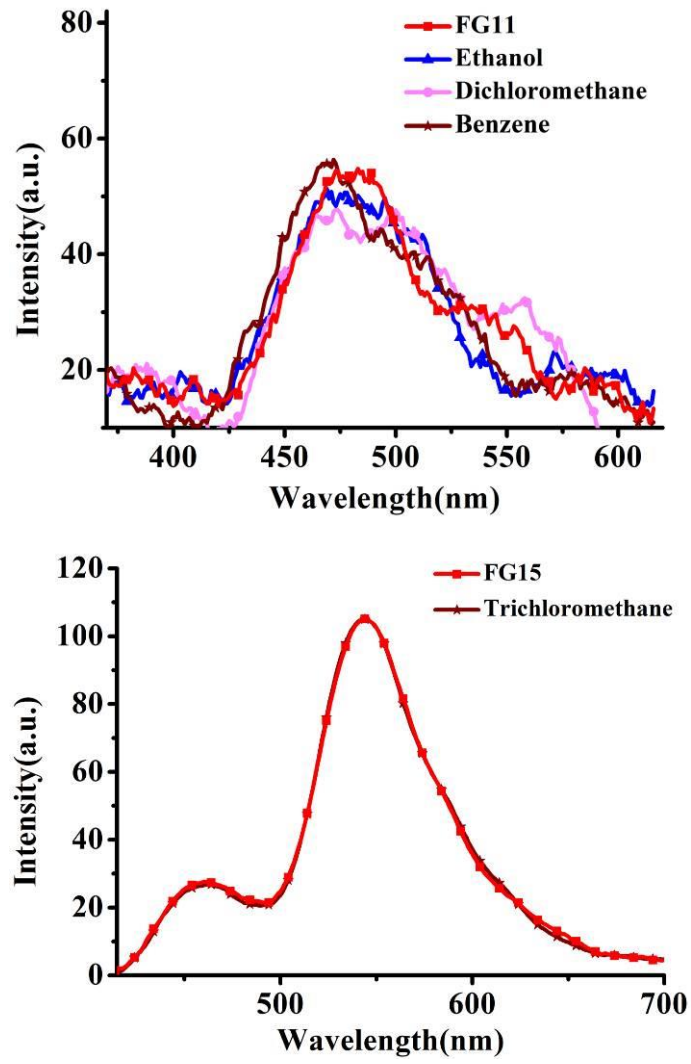

Fig. S26 the adsorption of neat FG for VOCs.
